# Supplementary material for: SNP-SNP interactions of three new pri-miRNAs with the target gene PGC and multidimensional analysis of H. pylori in the gastric cancer/atrophic gastritis risk in a Chinese population
Source: PubMed Central journal article supplement (PMC5029657; doi:10.18632/oncotarget.8057), 2016-03-14
Supplement: oncotarget-07-23700-s001.pdf [file oncotarget-07-23700-s001.pdf]

## SNP–SNP interactions of three new pri-miRNAs with the target gene *PGC* and multidimensional analysis of *H. pylori* in the gastric cancer/atrophic gastritis risk in a Chinese population

### SUPPLEMENTARY TABLES

Supplementary Table S1: The baseline of the subjects

| Variables        | AG vs. CON      |              | GC vs. CON      |              |
|------------------|-----------------|--------------|-----------------|--------------|
|                  | CON(%)          | AG(%)        | CON(%)          | GC(%)        |
|                  | <b>n=862</b>    | <b>n=862</b> | <b>n=729</b>    | <b>n=724</b> |
| Gender           | <i>P</i> =0.846 |              | <i>P</i> =0.564 |              |
| Male             | 483(56.0)       | 487(56.5)    | 483(66.3)       | 490(67.7)    |
| Female           | 379(44.0)       | 375(43.5)    | 246(33.7)       | 234(32.3)    |
| Age              | <i>P</i> =0.343 |              | <i>P</i> =0.562 |              |
| Mean±SD          | 54.9±9.2        | 55.4±9.5     | 56.1±9.2        | 56.4±9.8     |
| Median           | 54              | 56           | 56              | 57           |
| Range            | 17-85           | 16-79        | 17-85           | 21-81        |
| <i>H. pylori</i> | <i>P</i> <0.001 |              | <i>P</i> <0.001 |              |
| Positive         | 241(28.0)       | 505(58.6)    | 201(27.6)       | 369(51.0)    |
| Negative         | 621(72.0)       | 41.4(36.5)   | 528(72.4)       | 355(49.0)    |

Supplementary Table S2: The interaction of miRNA SNP-miRNA SNP in the risk of gastric cancer/atrophic gastritis<sup>a</sup>

|                                  |              | let7e rs8111742                |                 | miR-365b rs121224              |                 |
|----------------------------------|--------------|--------------------------------|-----------------|--------------------------------|-----------------|
|                                  |              | GA+GG                          | AA              | CG+CC                          | GG              |
| <b>AG vs CON (n=862 Vs. 862)</b> |              |                                |                 |                                |                 |
| miR-365b rs121224                |              |                                |                 |                                |                 |
| CG+CC                            | Case/Control | 634/649                        | 51/49           | /                              | /               |
|                                  | OR(95%CI)    | 1(Ref)                         | 1.06(0.71-1.59) | /                              | /               |
| GG                               | Case/Control | 167/151                        | 10/13           | /                              | /               |
|                                  | OR(95%CI)    | 1.13(0.88-1.44)                | 0.78(0.34-1.80) | /                              | /               |
|                                  |              | $P_{\text{interaction}}=0.244$ |                 | /                              |                 |
|                                  |              | interaction index=0.55         |                 |                                |                 |
| miR4795 rs1002765                |              |                                |                 |                                |                 |
| GA+GG                            | Case/Control | 668/671                        | 52/56           | 569/595                        | 151/132         |
|                                  | OR(95%CI)    | 1(Ref)                         | 0.93(0.63-1.38) | 1(Ref)                         | 1.19(0.92-1.55) |
| AA                               | Case/Control | 133/129                        | 9/6             | 116/103                        | 26/32           |
|                                  | OR(95%CI)    | 1.05(0.80-1.37)                | 1.50(0.53-4.24) | 1.20(0.90-1.60)                | 0.85(0.50-1.44) |
|                                  |              | $P_{\text{interaction}}=0.636$ |                 | $P_{\text{interaction}}=0.196$ |                 |
|                                  |              | interaction index=1.33         |                 | interaction index=0.64         |                 |
| <b>GC vs CON (n=724 Vs. 729)</b> |              |                                |                 |                                |                 |
| miR-365b rs121224                |              |                                |                 |                                |                 |
| CG+CC                            | Case/Control | 551/546                        | 46/45           | /                              | /               |
|                                  | OR(95%CI)    | 1(Ref)                         | 1.01(0.66-1.54) | /                              | /               |
| GG                               | Case/Control | 115/128                        | 12/10           | /                              | /               |
|                                  | OR(95%CI)    | 0.88(0.67-1.17)                | 1.18(0.51-2.76) | /                              | /               |
|                                  |              | $P_{\text{interaction}}=0.368$ |                 | /                              |                 |
|                                  |              | interaction index=1.59         |                 |                                |                 |
| miR4795 rs1002765                |              |                                |                 |                                |                 |
| GA+GG                            | Case/Control | 569/568                        | 52/51           | 512/511                        | 109/108         |
|                                  | OR(95%CI)    | 1(Ref)                         | 1.01(0.68-1.52) | 1(Ref)                         | 1.00(0.75-1.35) |
| AA                               | Case/Control | 97/106                         | 6/4             | 85/80                          | 18/30           |
|                                  | OR(95%CI)    | 0.93(0.69-1.25)                | 1.49(0.42-5.32) | 1.08(0.78-1.51)                | 0.60(0.33-1.08) |
|                                  |              | $P_{\text{interaction}}=0.368$ |                 | $P_{\text{interaction}}=0.155$ |                 |
|                                  |              | interaction index=1.44         |                 | interaction index=0.58         |                 |

Note:<sup>a</sup>,  $P$  for interaction was used Logistic Regression adjusted by gender, age and *H. pylori* infection status. CON:controls; AG: atrophic gastritis; GC:gastric cancer.

**Supplementary Table S3: MiRNA-PGC gene interaction models for polymorphisms and for *H. pylori* in gastric cancer and/or atrophic gastritis risk by MDR analysis**

| Model                                              | Training Bal. Acc. | Testing Bal. Acc. | Sign Test (p)     | CV Consistency | P for permutation test |
|----------------------------------------------------|--------------------|-------------------|-------------------|----------------|------------------------|
| For AG risk                                        |                    |                   |                   |                |                        |
| Two-way interaction                                |                    |                   |                   |                |                        |
| let-7e rs8111742-PGC rs6458238                     | 0.5344             | 0.5288            | <b>9(0.0107)</b>  | 9/10           | <b>0.0020-0.0025</b>   |
| miR-4795 rs1002765-PGC rs9471643                   | 0.5397             | 0.5312            | <b>9(0.0107)</b>  | 10/10          | <b>0.0015-0.0020</b>   |
| miR-365b rs121224-PGC rs6912200                    | 0.5127             | 0.4780            | 3(0.9453)         | 7/10           | 0.9660-0.9665          |
| let-7e rs8111742-PGC rs6941539                     | 0.5259             | 0.5052            | 5(0.6230)         | 8/10           | 0.5390                 |
| Three-way interaction                              |                    |                   |                   |                |                        |
| let-7e rs8111742-PGC rs6458238- <i>H. pylori</i>   | 0.6707             | 0.6678            | <b>10(0.0010)</b> | 5/10           | <b>0.0000-0.0005</b>   |
| let-7e rs8111742-PGC rs6941539- <i>H. pylori</i>   | 0.6547             | 0.6500            | <b>10(0.0010)</b> | 10/10          | <b>0.0000-0.0005</b>   |
| miR-4795 rs1002765-PGC rs9471643- <i>H. pylori</i> | 0.6720             | 0.6630            | <b>10(0.0010)</b> | 5/10           | <b>0.0000-0.0005</b>   |
| For GC risk                                        |                    |                   |                   |                |                        |
| let-7e rs8111742-PGC rs6458238- <i>H. pylori</i>   | 0.6883             | 0.6854            | <b>10(0.0010)</b> | 10/10          | <b>0.0000-0.0005</b>   |

Note: When the *P* value for the Sign Test <0.05 and *P* for permutation test <0.05 meant a statistical difference. AG, atrophic gastritis; GC, gastric cancer.
